# Supplementary material for: Does taking an angiotensin inhibitor increase the risk for COVID-19? – a systematic review and meta-analysis
Source: publisher site journal article supplement (doi:10.18632/aging.202902), 2021-04-22
Supplement: Supplementary file [file aging-v13i8-202902-supplementary-material-SD1.pdf]

**SUPPLEMENTARY FIGURES**

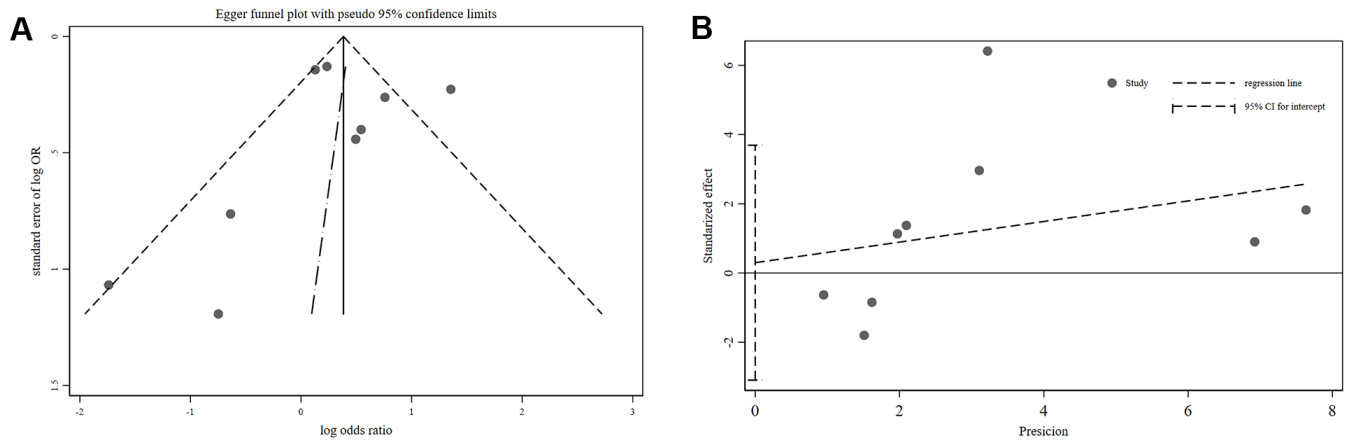

**Supplementary Figure 1. Funnel plots for publication bias testing. (A) Egger’s funnel plots of included studies. (B) Begg’s funnel plots of included studies.**

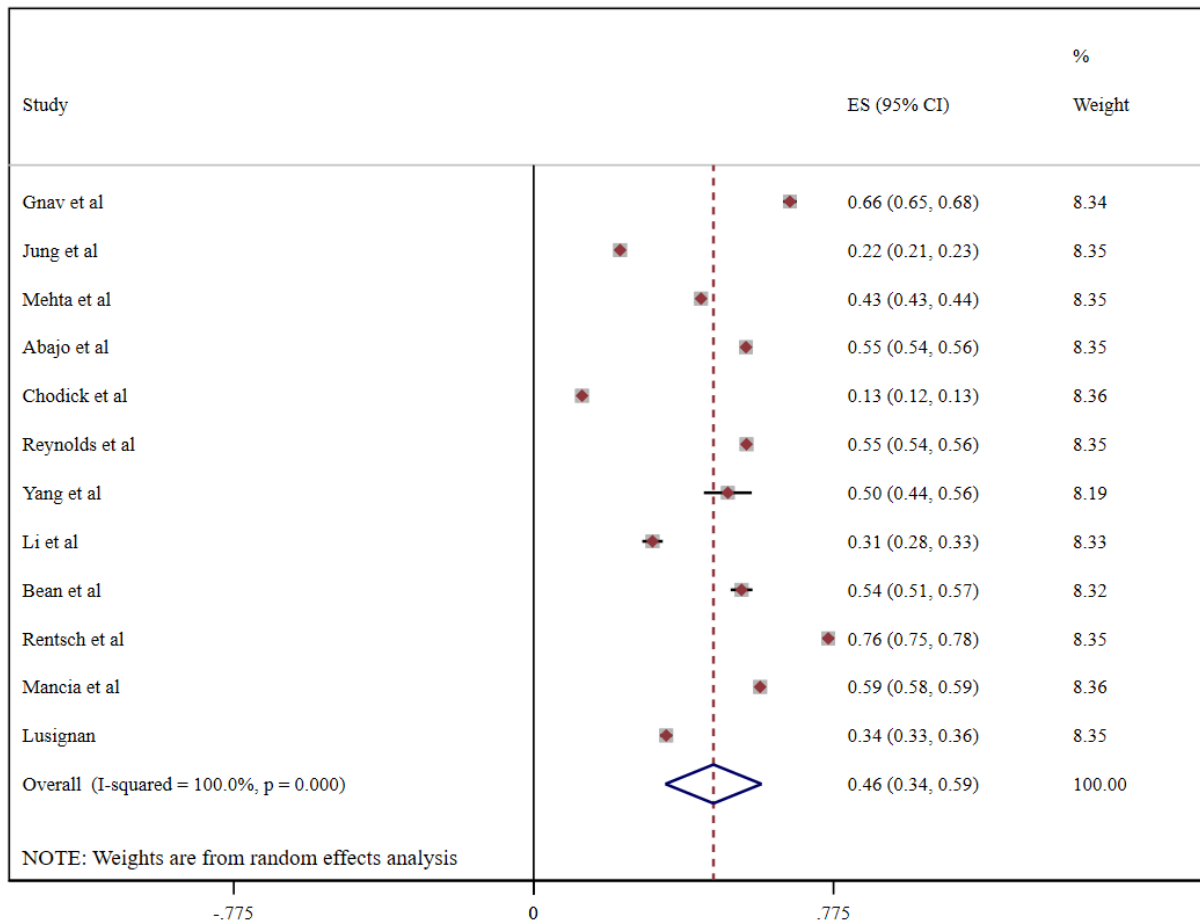

**Supplementary Figure 2. Forest plot of the prevalence of hypertension in general population.**

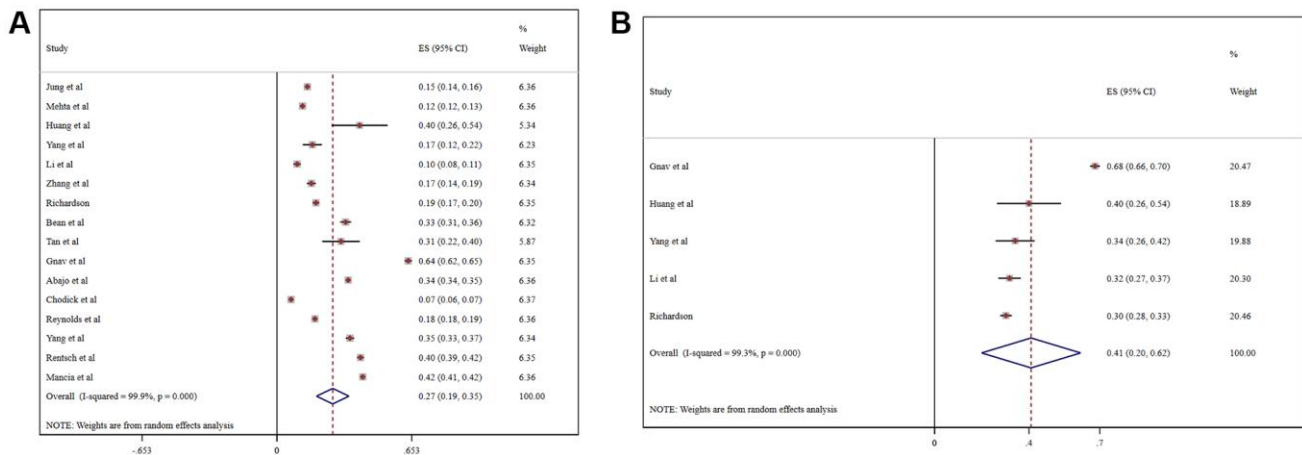

Supplementary Figure 3. Forest plot of the ACEI/ARB usage rate in the general population (A) and a hypertensive population (B).

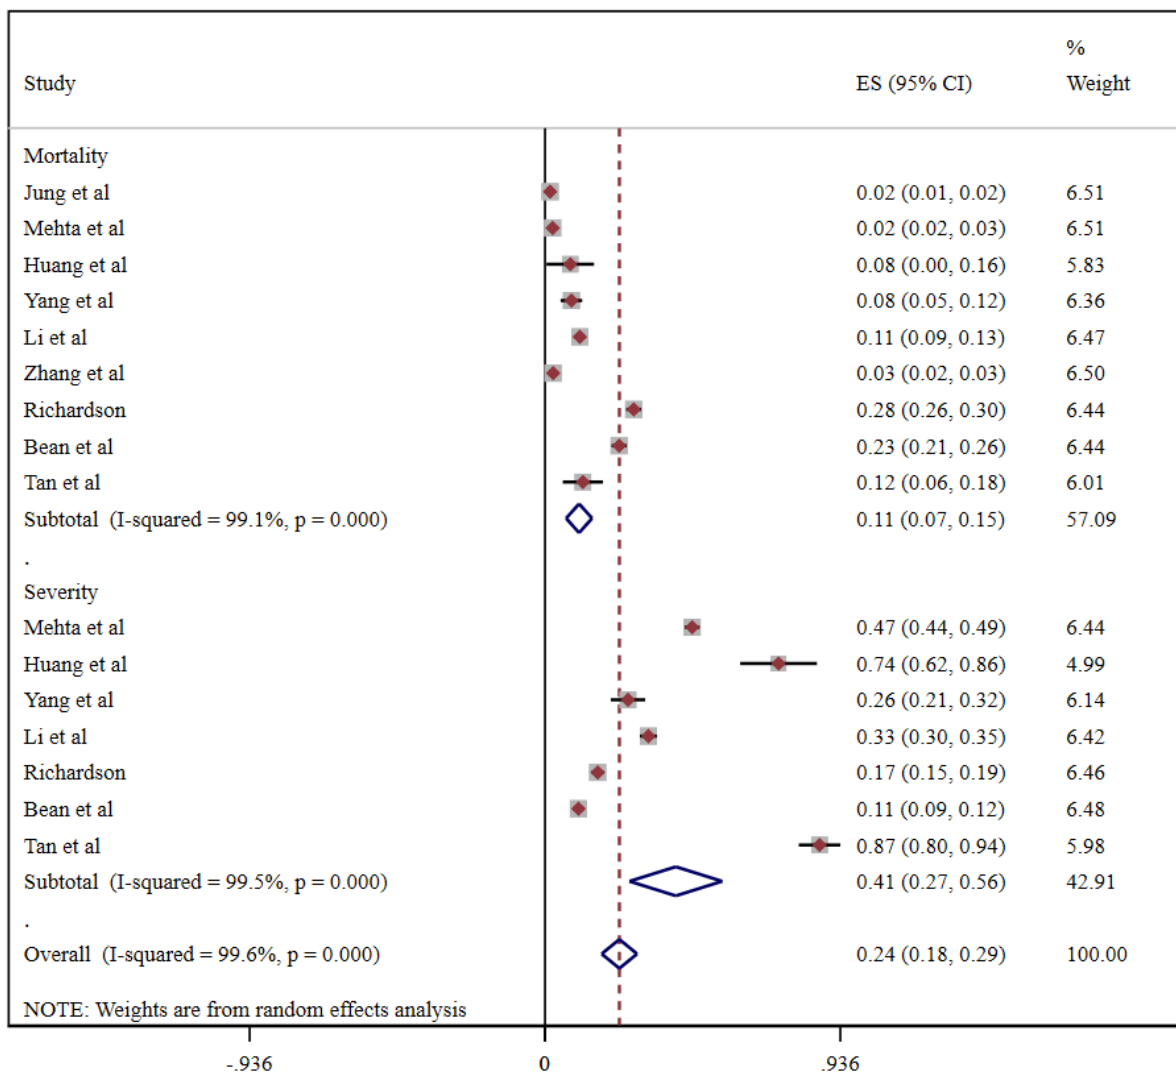

Supplementary Figure 4. Forest plot of the prevalence of adverse outcomes, including severe COVID-19 and mortality, in the general population.
